# Supplementary material
Source: PubMed Central journal article supplement (PMC6842113)
Supplement: NIHMS1537083-supplement-2.pdf [file NIHMS1537083-supplement-2.pdf]

## Supplemental Figures and Table

**A**

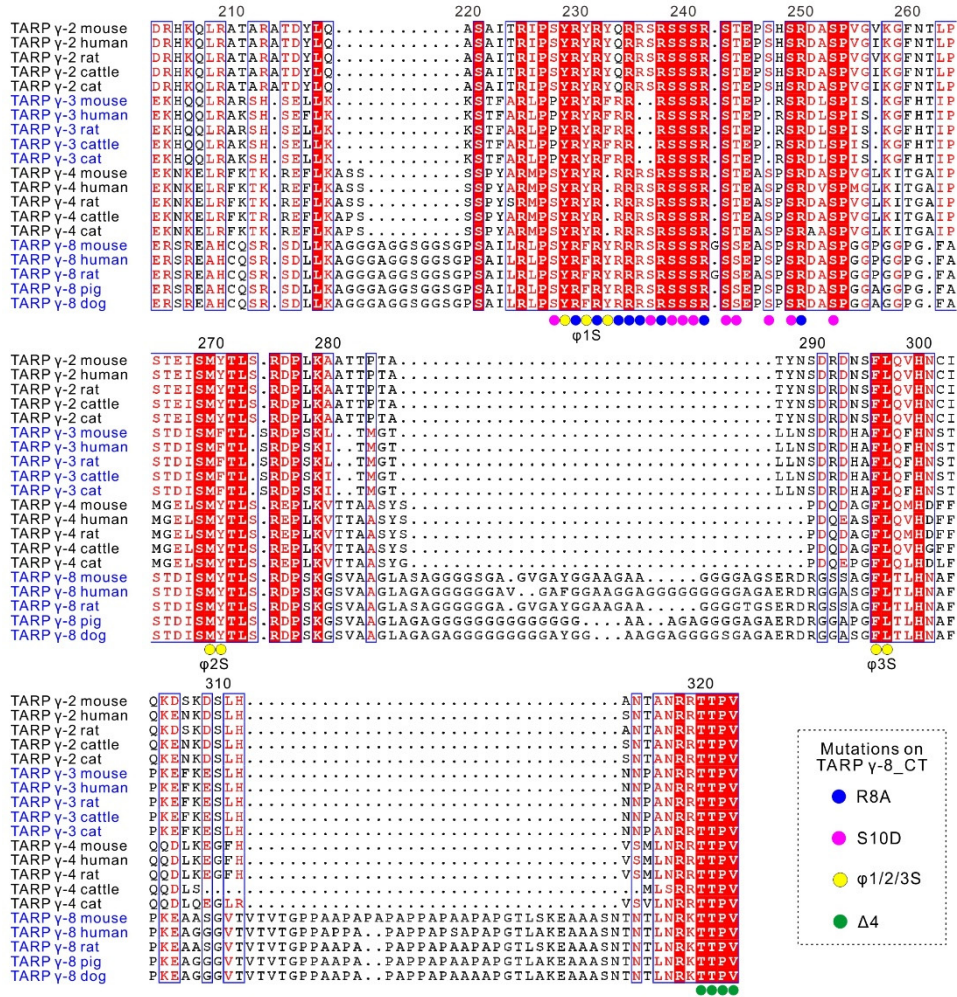

**B**

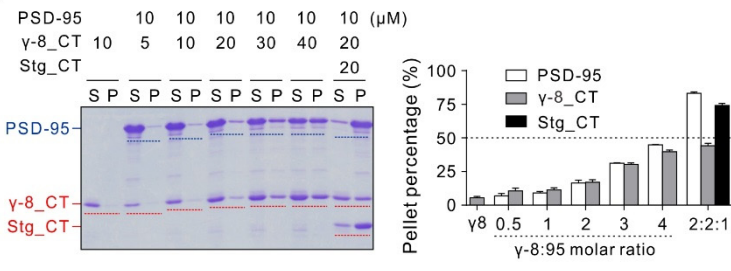

**C**

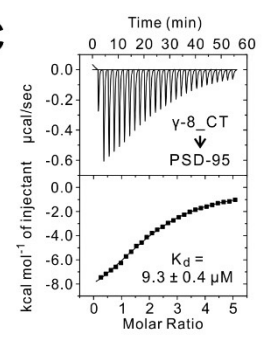

**D**

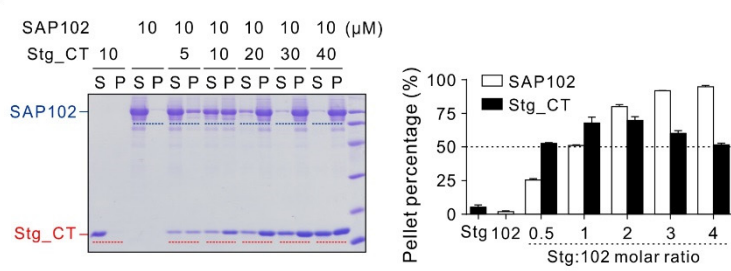

**E**

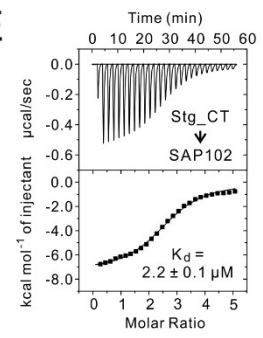

**Supplemental Figure 1: Other TARP and MAGUK complexes also undergo LLPS.  
(Related to Figures 1&2)**

- A: Detailed sequence alignment of the cytoplasmic tails of TARP family members from different species. Totally conserved residues are labeled by white text in red background. Highly conserved residues are labeled by red text. Stg is referred to as TARP  $\gamma$ -2 here. Residues mutated in TARP  $\gamma$ -8\_CT in Figure 6 corresponding to mutations in Stg\_CT in Figure 2C are denoted by colored circles as indicated.
- B: Sedimentation experiments showing higher  $\gamma$ -8:95 molar ratio promoted LLPS of the mixtures. In the last group, 20  $\mu$ M TARP  $\gamma$ -8\_CT, 20  $\mu$ M Stg\_CT and 10  $\mu$ M PSD-95 were mixed, showing all three components were enriched in the condensed droplets.
- C: ITC-based assay measuring the binding affinity between TARP  $\gamma$ -8\_CT and PSD-95. TARP  $\gamma$ -8\_CT at 250  $\mu$ M was titrated into PSD-95 at 10  $\mu$ M.
- D: Sedimentation experiments showing the distribution of Stg\_CT and SAP102 in aqueous/condensed phases. The quantification results in panels B and D were from 3 independent batches of sedimentation experiments and represented as mean  $\pm$  SD.
- E: ITC-based assay measuring the binding affinity between Stg\_CT and SAP102. Stg\_CT at 250  $\mu$ M was titrated into SAP102 at 10  $\mu$ M.

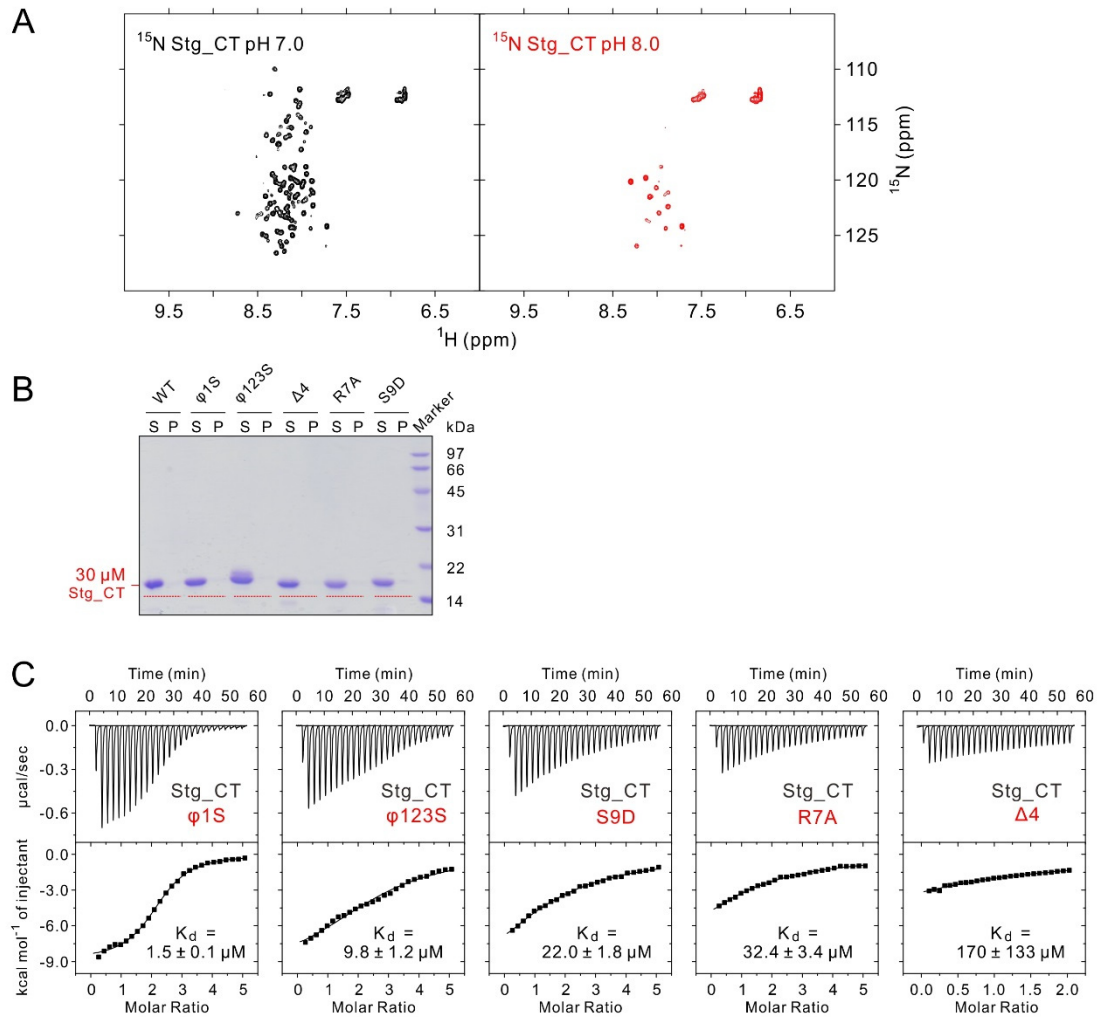

**Supplemental Figure 2: Quality controls of Stg\_CT in NMR, sedimentation experiments and ITC titrations. (Related to Figures 1-3)**

- A:  $^1\text{H}$ ,  $^{15}\text{N}$ -HSQC spectra of the  $^{15}\text{N}$ -labeled Stg\_CT (0.1 mM) at pH 7.0 (left) and pH 8.0 (right). The narrow peak distributions of the spectra indicated that Stg\_CT is intrinsically disordered, which is further confirmed by the overall peak disappearance upon raising the sample pH to 8.0.
- B: Sedimentation experiments of 30  $\mu\text{M}$  Stg\_CT alone (WT or mutants) showing all mutant proteins were highly soluble and with high purity.
- C: ITC-based measurement comparing the binding affinities of different Stg\_CT (WT or mutants) to PSD-95. 250  $\mu\text{M}$  PBM-containing mutant Stg\_CT ( $\phi 1\text{S}$ ,  $\phi 123\text{S}$ , S9D, R7A) was titrated into 10  $\mu\text{M}$  PSD-95. 270  $\mu\text{M}$  Stg\_CT  $\Delta 4$  without PBM was titrated into 27  $\mu\text{M}$  PSD-95.

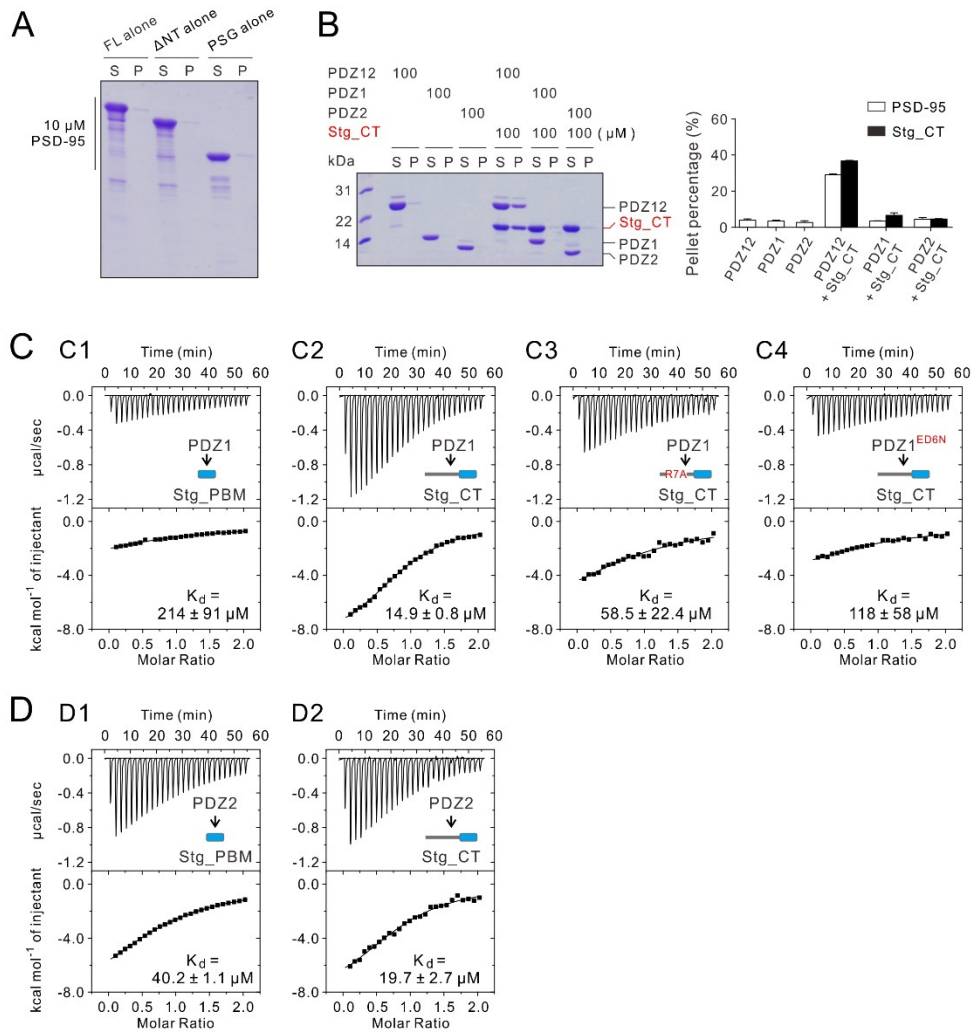

**Supplemental Figure 3: Mechanisms of PSD-95 PDZ12 binding to Stg\_CT. (Related to Figures 1-3)**

A: Sedimentation experiments of 10  $\mu$ M PSD-95 alone (WT or truncated fragments) showing the proteins were soluble and with good qualities.

B: Sedimentation experiments showing the mixtures of PSD-95 PDZ12 and Stg\_CT underwent LLPS. 100  $\mu$ M PSD-95 PDZ12, PDZ1 or PDZ2 alone were highly soluble. When mixed with 100  $\mu$ M Stg\_CT, PDZ12 & Stg\_CT complex underwent LLPS while PDZ1 or 2 did not. Quantification results were from 3 independent batches of sedimentation experiments and represented as mean  $\pm$  SD.

C: ITC-based measurements comparing the binding affinities between PSD-95 PDZ1 and Stg\_PBM or Stg\_CT. 500  $\mu$ M PSD-95 PDZ1 was titrated into 50  $\mu$ M Stg\_PBM or Stg\_CT as labeled.

D: ITC-based measurements comparing the binding affinities between PSD-95 PDZ2 and Stg\_PBM or Stg\_CT. 500  $\mu$ M PSD-95 PDZ2 was titrated into 50  $\mu$ M Stg\_PBM or Stg\_CT as labeled.

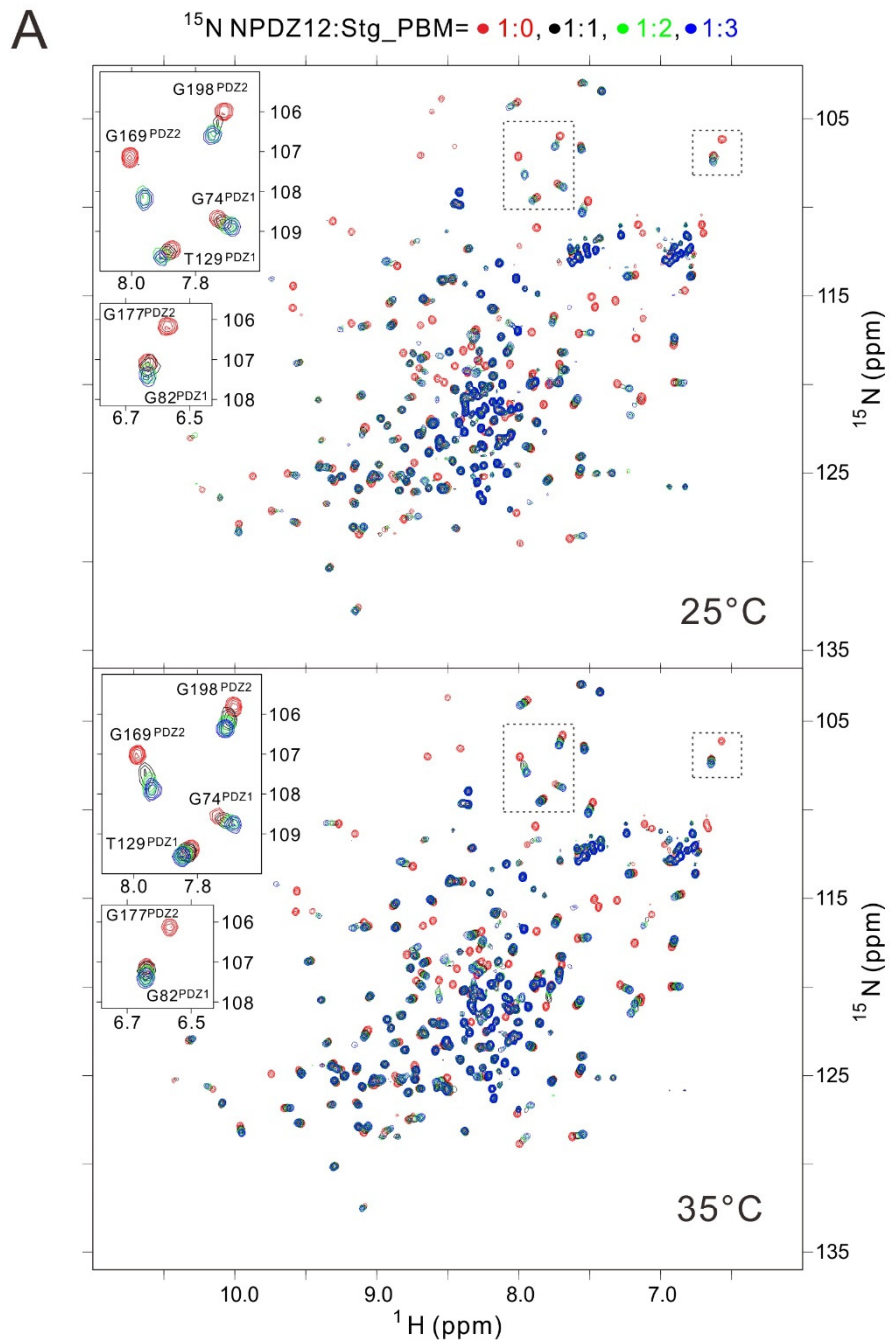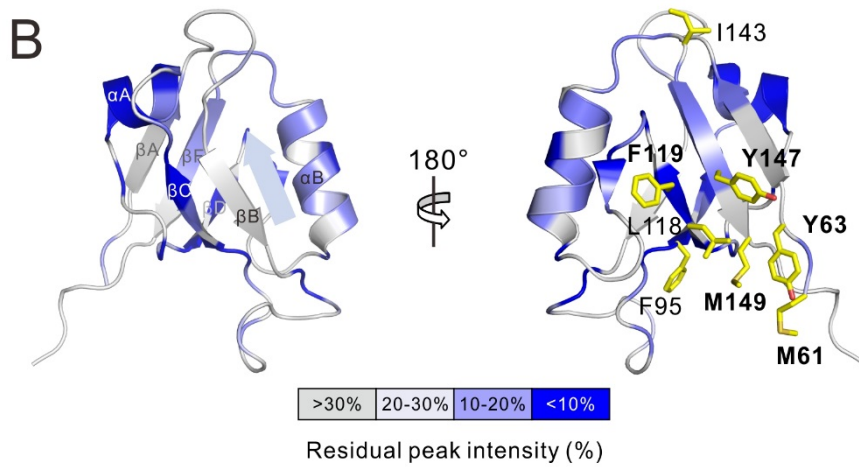



**Supplemental Figure 4: NMR analysis of the Stg\_CT binding sites on PSD-95 NPDZ12. (Related to Figure 3)**

- A: Superposition plot of the  $^1\text{H}$ ,  $^{15}\text{N}$ -HSQC spectra of apo-form PSD-95 NPDZ12 (0.1 mM) (red), bound to Stg\_PBM in 1:1 (black), 1:2 (green) and 1:3 (blue) molar ratios at 25°C (up) or 35°C (below). Insertions are zoom-in analyses of selected regions (dashed boxes) showing residues from PDZ1 or 2 underwent fast-intermediate exchanges at 25°C (up). When the sample temperature was raised to 35°C (below), the equilibrium shifted to fast exchange regime. It is noted that PDZ2 exhibited much more obvious chemical shift changes than PDZ1, suggesting a stronger interaction to Stg\_PBM. The dashed box containing G82 and G177 is also shown in Figure 3D.
- B: The residues in the PBM binding pocket of PSD-95 PDZ1 have minimal Stg\_CT\_Δ4 binding-induced chemical shift changes. Instead, the surface opposite to the PBM binding groove has large Stg\_CT\_Δ4 binding-induced shift changes as shown in Figure 3G. Backbone amide peak broadening of PDZ1 resulted from Stg\_CT\_Δ4 interaction was mapped to the structure of PDZ1 (PDB 2KA9). Ribbon combined the stick model showing the hydrophobic residues in negatively charged PDZ1 surface. The hydrophobic residues specifically conserved in PDZ1 (as indicated by green triangles in Figure 4H) are shown in bold-face letters.

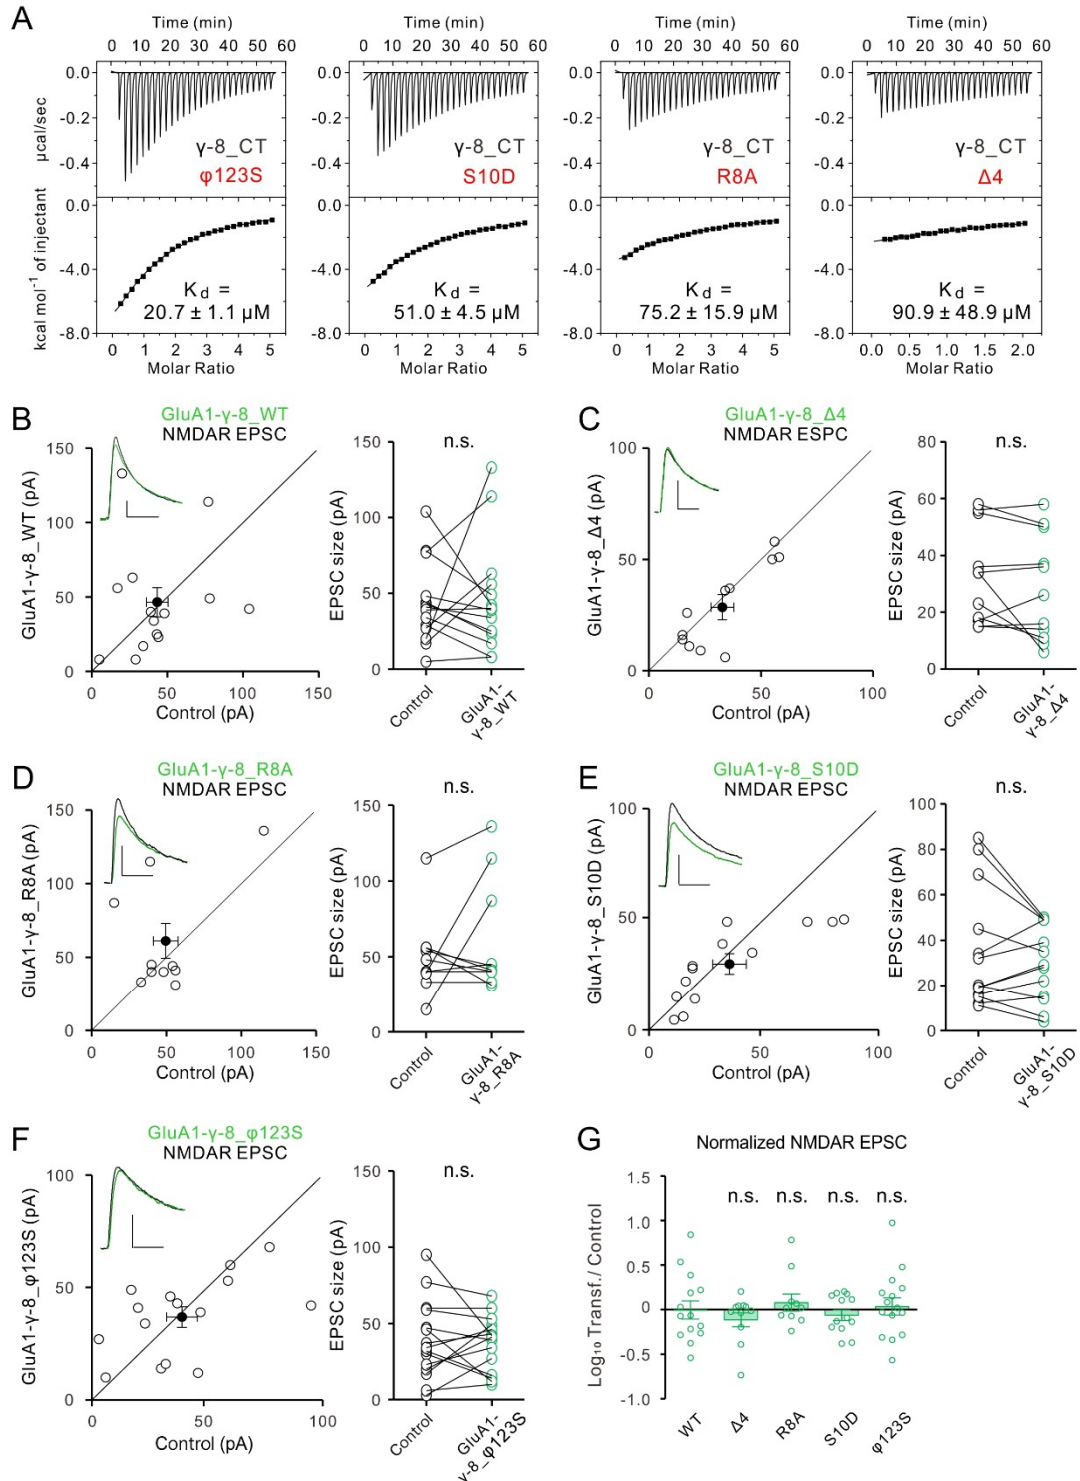

**Supplemental Figure 5: Intact NMDAR EPSC upon endogenous AMPAR replacement with tethered GluA1- $\gamma\text{-8}$ . (Related to Figure 6)**

A: ITC-based measurements comparing the binding affinities between PSD-95 and different forms of TARP  $\gamma\text{-8\_CT}$ . 250  $\mu\text{M}$  PBM-containing mutant  $\gamma\text{-8\_CT}$  ( $\phi 123\text{S}$ , S10D, R8A) was titrated into 10  $\mu\text{M}$  PSD-95. 250  $\mu\text{M}$   $\gamma\text{-8\_CT}$   $\Delta 4$  without PBM was



titrated into 25  $\mu$ M PSD-95.

B-F: Scatterplots of NMDAR EPSC for single pairs (open circles) of control and GluA1- $\gamma$ -8\_WT (B, n = 14 pairs), GluA1- $\gamma$ -8\_ $\Delta$ 4 (C, n = 11 pairs), GluA1- $\gamma$ -8\_R8A (D, n = 10 pairs), GluA1- $\gamma$ -8\_S10D (E, n= 13 pairs) or GluA1- $\gamma$ -8\_ $\phi$ 123S (F, n = 15 pairs). Filled circles represent mean  $\pm$  SEM. Insets show sample current traces from control (black) and transfected (green) neurons. Scale bars: 50 pA, 50 ms.

G: Summary plot comparing the log<sub>10</sub> of the transfected/control neuron NMDAR EPSC ratio in all conditions tested. Statistical significance was analyzed using the Wilcoxon signed-rank test in B-F. One way ANOVA with Bonferroni multiple comparison test was used to compare relevant groups in G. n.s. not significant.

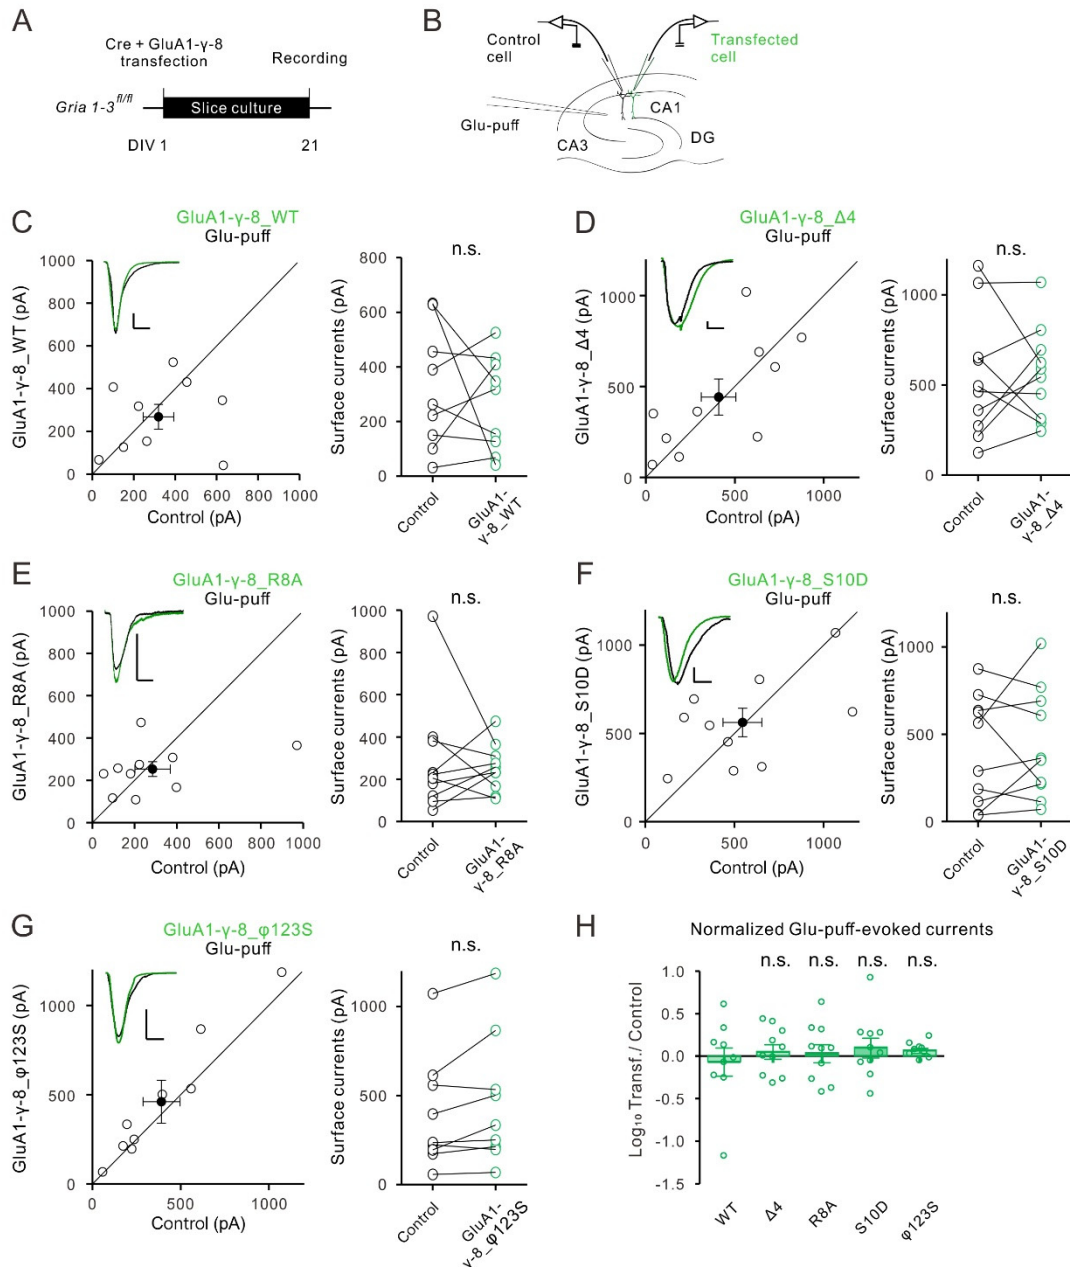

**Supplemental Figure 6: Surface AMPAR currents upon endogenous AMPAR replacement with tethered GluA1- $\gamma$ -8. (Related to Figure 6)**

A: Timeline of the experiment.

B: Scheme of the AMPAR replacement strategy and dual whole-cell recordings from transfected (green) and control (black) CA1 pyramidal neurons. Surface currents are evoked by fast application of 1 mM glutamate.

C-G: Scatterplots (left) and paired dot plots (right) of surface currents evoked by fast application of 1 mM glutamate for single pairs (open circles) of control and GluA1- $\gamma$ -8\_WT. (C, n = 9 pairs), GluA1- $\gamma$ -8\_Δ4 (D, n = 10 pairs), GluA1- $\gamma$ -8\_R8A (E, n = 9 pairs), GluA1- $\gamma$ -8\_S10D (F, n = 10 pairs) or GluA1- $\gamma$ -8\_φ123S (G, n = 9 pairs). Filled circles represent mean  $\pm$  SEM. Insets show sample current traces from control

(black) and transfected (green) neurons.

H: Summary plot comparing the  $\log_{10}$  of the transfected/control neuron AMPAR surface current ratio in all conditions tested. Scale bars: 100 pA, 2 sec. Statistical significance was analyzed using the Wilcoxon signed-rank test in C-G. One way ANOVA with Bonferroni multiple comparison test was used to compare relevant groups in H.

**Supplemental Table 1: Summary parameters for the ITC experiments described in the manuscript. (Related to Figures 1-3)**

|                 | Protein<br>in syringe       | Protein<br>in cell | $K_d$<br>( $\mu$ M) | N value<br>(sites) | $\Delta S$<br>(cal/mol/deg) |
|-----------------|-----------------------------|--------------------|---------------------|--------------------|-----------------------------|
| Figure 1B left  | TRX-Stg_PBM                 | 95_FL              | 48.5 $\pm$ 5.9      | 0.97 $\pm$ 0.36    | -72.7                       |
| Figure 1B right | Stg_CT                      | 95_FL              | 0.63 $\pm$ 0.06     | 2.21 $\pm$ 0.02    | -5.1                        |
| Figure S1C      | $\gamma$ -8_CT              | 95_FL              | 9.3 $\pm$ 0.4       | 2.12 $\pm$ 0.03    | -14.9                       |
| Figure S1E      | Stg_CT                      | 102_FL             | 2.2 $\pm$ 0.1       | 2.68 $\pm$ 0.02    | 1.2                         |
|                 | Stg_CT_ $\phi$ 1S           | 95_FL              | 1.5 $\pm$ 0.1       | 2.24 $\pm$ 0.02    | -3.0                        |
|                 | Stg_CT_ $\phi$ 123S         | 95_FL              | 9.8 $\pm$ 1.2       | 2.71 $\pm$ 0.08    | -10.8                       |
| Figure S2C      | Stg_CT_S9D                  | 95_FL              | 22.0 $\pm$ 1.8      | 1.69 $\pm$ 0.12    | -30.7                       |
|                 | Stg_CT_R7A                  | 95_FL              | 32.4 $\pm$ 3.4      | 1.11 $\pm$ 0.22    | -41.0                       |
|                 | Stg_CT_ $\Delta$ 4          | 95_FL              | 170 $\pm$ 133       | N.R                | N.R                         |
|                 | 95_PDZ1                     | TRX-Stg_PBM        | 214 $\pm$ 91        | N.R                | N.R                         |
| Figure S3C      | 95_PDZ1                     | Stg_CT             | 14.9 $\pm$ 0.8      | 0.92 $\pm$ 0.01    | -9.8                        |
|                 | 95_PDZ1                     | Stg_CT_R7A         | 58.5 $\pm$ 22.4     | 0.99 $\pm$ 0.23    | -12.9                       |
|                 | 95_PDZ1_ED6N                | Stg_CT             | 118 $\pm$ 58        | N.R                | N.R                         |
| Figure S3D      | 95_PDZ2                     | TRX-Stg_PBM        | 40.2 $\pm$ 1.1      | 0.87 $\pm$ 0.01    | -15.9                       |
|                 | 95_PDZ2                     | Stg_CT             | 19.7 $\pm$ 2.7      | 0.89 $\pm$ 0.04    | -8.6                        |
|                 | $\gamma$ -8_CT_ $\phi$ 123S | 95_FL              | 20.7 $\pm$ 1.1      | 1.02 $\pm$ 0.08    | -47.4                       |
| Figure S5A      | $\gamma$ -8_CT_S10D         | 95_FL              | 51.0 $\pm$ 4.5      | N.R                | N.R                         |
|                 | $\gamma$ -8_CT_R8A          | 95_FL              | 75.2 $\pm$ 15.9     | N.R                | N.R                         |
|                 | $\gamma$ -8_CT_ $\Delta$ 4  | 95_FL              | 90.9 $\pm$ 48.9     | N.R                | N.R                         |

N.R: no reliable data could be obtained due to very weak binding
